# Supplementary material for: Geographic Patterns of Genetic Variation in a Broadly Distributed Marine Vertebrate: New Insights into Loggerhead Turtle Stock Structure from Expanded Mitochondrial DNA Sequences
Source: PLoS One. 2014 Jan 23;9(1):e85956. doi: 10.1371/journal.pone.0085956 (PMC3900438; doi:10.1371/journal.pone.0085956)
Supplement: Table S8 — AMOVA results for alternative management scenarios to test Mediterranean groupings based on 14 core RMUs and MUs that were held constant in their isolation: 1) NUSA, 2) CEFL, 3) SEFL, 4) DRSL, 5) QRMX, 6) KEY, 7) CSK, 8) NWFL, 9) BRZN, 10) RIO, 11) CPVD, 12) CAL, 13) NAT 14) MAS. (XLS) [file pone.0085956.s008.xls]

## Sheet: Sheet1
Table S8. AMOVA results for alternative management scenarios to test Mediterranean groupings based on 14 core RMUs and MUs that were held constant in their isolation: 1) NUSA, 2) CEFL, 3) SEFL, 4) DRSL, 5) QRMX, 6) KEY, 7) CSK, 8) NWFL, 9) BRZN, 10) RIO, 11) CPVD, 12) CAL, 13) NAT 14) MAS.
	FCT	FCT p	FSC	FSC p
6 RMUs	0.35715	< 0.0001	0.16299	< 0.0001
4 MED MUs (DLY/DAL); (ZAK/KYP/LAK/CRT/TKW/TKM/TKE/ALA/AKA/LEB/ISR); (SIR/MIS) (proposed in Clusa et al. 2013)	0.35186	< 0.0001	0.01436	< 0.0001
7 MED MUs (ZAK/KYP/LAK); (CRT); (DLY/DAL); (TKW); (TKM/TKE/ALA/AKA/LEB/ISR); (SIR/MIS)	0.35211	< 0.0001	0.01101	0.00098
8 MED MUs A (ZAK/KYP/LAK); (CRT); (DLY/DAL); (TKW); (TKM/TKE/ALA/AKA/LEB/ISR); (SIR); (MIS)	0.35473	< 0.0001	0.00712	0.00293
8 MED MUs B (ZAK/KYP/LAK); (CRT); (DLY); (DAL); (TKW); (TKM/TKE/ALA/AKA/LEB/ISR); (SIR/MIS)	0.35587	< 0.0001	0.00539	0.00391
9 MED MUs (ZAK/KYP/LAK); (CRT); (DLY); (DAL); (TKW); (TKM/TKE/ALA/AKA/LEB/ISR); (SIR); (MIS)	0.35862	< 0.0001	0.00126	0.05376
Analyses were based on haplotype frequencies for 817 bp contorl region sequences.
